# Supplementary material for: Genetic and phenotypic diversity of selected Kenyan mung bean (Vigna radiata L. Wilckzek) genotypes
Source: PubMed Central journal article supplement (PMC8476662; doi:10.1186/s43141-021-00245-9), 2021-09-27
Supplement: 43141_2021_245_MOESM1_ESM.pdf [file 43141_2021_245_MOESM1_ESM.pdf]

|    | Reps | Mean LnP(K) | Stdev LnP(K) | Ln'(K)     | Ln''(K)   | Delta K  |
|----|------|-------------|--------------|------------|-----------|----------|
| 1  | 10   | -221.340000 | 1.413585     | —          | —         | —        |
| 2  | 10   | -232.040000 | 17.734474    | -10.700000 | 13.220000 | 0.745441 |
| 3  | 10   | -229.520000 | 20.740181    | 2.520000   | 32.330000 | 1.558810 |
| 4  | 10   | -259.330000 | 70.719965    | -29.810000 | 59.120000 | 0.835973 |
| 5  | 10   | -230.020000 | 20.906182    | 29.310000  | 25.710000 | 1.229780 |
| 6  | 10   | -226.420000 | 7.879058     | 3.600000   | 4.160000  | 0.527982 |
| 7  | 10   | -218.660000 | 2.853146     | 7.760000   | 13.660000 | 4.787697 |
| 8  | 10   | -224.560000 | 11.462906    | -5.900000  | 10.180000 | 0.888082 |
| 9  | 10   | -220.280000 | 6.546551     | 4.280000   | 4.110000  | 0.627811 |
| 10 | 10   | -220.110000 | 3.990670     | 0.170000   | —         | —        |

Supplementary file 1
